# Supplementary material
Source: PubMed Central journal article supplement (PMC5354992)
Supplement: NIHMS820652-supplement-3.pdf [file NIHMS820652-supplement-3.pdf]

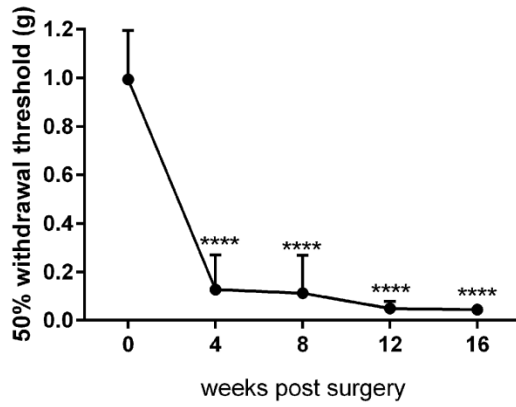

**Supplemental Fig 2.** Mechanical allodynia was assessed in the ipsilateral hind paw of CX3CR1-GFP<sup>+/-</sup> mice through 16 weeks after DMM surgery. A decrease in withdrawal threshold from the baseline at time 0 indicates development of mechanical allodynia. mean  $\pm$  95%CI, n = 4, \*\*\*\*p<0.0001 vs. time 0.
